# Supplementary material
Source: PubMed Central journal article supplement (PMC7136970)
Supplement: NIHMS1571828-supplement-ESM1.pdf [file NIHMS1571828-supplement-ESM1.pdf]

| AgeDiff | Focal.Subject | Ind_Traveler | OrphanStatus | YoungerSib  | ObsHours | Association | Proximity | GroomMin | TravelVigilance | Reassurance |
|---------|---------------|--------------|--------------|-------------|----------|-------------|-----------|----------|-----------------|-------------|
|         | 6 Fleck       | 1            | 0            | Salonen,    | 49.6     | 37          | 51        | 0.18     | 3               | 1           |
|         | 5 Larson      | 1            | 0            | DiDonato,   | 46.8     | 30          | 63        | 10.77    | 2               | 2           |
| 4.4     | Williams      | 1            | 0            | Elvira,     | 35.2     | 34          | 64        | 8.33     | 1               | 0           |
| 5.6     | Benny         | 1            | 0            | YoYo,       | 24.7     | 9           | 3         | 0        | 1               | 0           |
| 6.2     | Orff          | 1            | 0            | Naidu,      | 51.2     | 20          | 22        | 0        | 1               | 0           |
| 6.6     | Jarman        | 1            | 0            | Toshi,      | 52.6     | 24          | 31        | 17.77    | 1               | 0           |
| 6.7     | Dylan         | 1            | 0            | Pilar,      | 26.1     | 16          | 48        | 2.1      | 1               | 1           |
| 6.8     | BillyBragg    | 1            | 0            | Flanagan,   | 51.5     | 21          | 19        | 3.68     | 1               | 0           |
| 7.4     | Bosko         | 1            | 0            | Josipa,     | 52.8     | 27          | 15        | 0        | 1               | 0           |
| 4.4     | Cannonball    | 1            | 0            | Fricka,     | 46.7     | 27          | 30        | 0        | 0               | 1           |
| 4.8     | Booker        | 1            | 0            | Gus,        | 45       | 9           | 12        | 0        | 0               | 0           |
| 6.2     | Murray        | 1            | 0            | Struhsaker, | 46.4     | 29          | 48        | 2.9      | 0               | 0           |
| 6.7     | Lovano        | 1            | 0            | Dylan,      | 46.2     | 18          | 9         | 3.25     | 0               | 1           |
| 8.2     | Gus           | 0            | 0            | Denis,      | 43.4     | 27          | 65        | 8.9      | 0               | 4           |
| 8.3     | Elton         | 1            | 0            | Cedar,      | 42.4     | 24          | 28        | 0.15     | 0               | 1           |
| 8.3     | Larson        | 0            | 0            | Whitman,    | 46.8     | 30          | 67        | 6.08     | 0               | 6           |
| 8.4     | Williams      | 0            | 0            | Caceres,    | 35.2     | 34          | 87        | 3.37     | 0               | 8           |
| 9.5     | Chopin        | 1            | 0            | BobiWine,   | 45.7     | 19          | 5         | 1.1      | 0               | 0           |
| 10      | Barron        | 1            | 0            | Naidu,      | 47       | 10          | 8         | 0        | 0               | 0           |
| 11.2    | Benny         | 1            | 0            | Joya,       | 24.7     | 8           | 2         | 0        | 0               | 0           |
| 11.2    | Jarman        | 0            | 0            | Callas.4,   | 29.3     | 17          | 5         | 0        | 0               | 0           |
| 11.5    | Murray        | 0            | 0            | Junot,      | 42.1     | 27          | 31        | 0        | 0               | 0           |
| 11.6    | Abrams        | 1            | 0            | Toshi,      | 47.6     | 10          | 1         | 0        | 0               | 0           |
| 13      | Booker        | 0            | 0            | Denis,      | 33.3     | 2           | 9         | 0        | 0               | 0           |
| 13.2    | Bosko         | 0            | 0            | Julianne.4, | 10.4     | 3           | 0         | 0        | 0               | 0           |
| 13.3    | Lovano        | 1            | 0            | Pilar,      | 23.6     | 10          | 8         | 0.67     | 0               | 0           |
| 13.3    | Wilson        | 1            | 0            | Cedar,      | 48.7     | 7           | 2         | 0        | 0               | 0           |
| 16      | Buckner       | 0            | 0            | Lucia.4,    | 24.6     | 2           | 8         | 0        | 0               | 0           |
| 16.2    | Abrams        | 0            | 0            | Callas.4,   | 18.8     | 3           | 1         | 0        | 0               | 0           |
| 16.4    | Haden         | 0            | 0            | Muhammad..  | 61.1     | 16          | 34        | 6.22     | 0               | 4           |
| 4.7     | Damien        | 1            | 0            | EttaJames,  | 21.6     | 12          | 17        | 3.08     | 1               | 1           |
| 5.6     | YoYo          | 1            | 0            | Joya,       | 29.2     | 19          | 44        | 5.93     | 1               | 3           |
| 5       | Nelson        | 1            | 0            | Amina,      | 20       | 19          | 57        | 3.25     | 0               | 2           |
| 10.6    | Buckner       | 1            | 0            | Holland,    | 24.6     | 4           | 7         | 0        | 0               | 0           |
| 4.7     | Damien        | 1            | 1            | EttaJames,  | 38.4     | 26          | 32        | 11.5     | 32              | 9           |
| 10.6    | Buckner       | 1            | 1            | Holland,    | 23.5     | 26          | 60        | 104.13   | 27              | 9           |
| 5.6     | YoYo          | 1            | 1            | Joya,       | 25.4     | 29          | 49        | 59.93    | 14              | 7           |
| 5       | Nelson        | 1            | 1            | Amina,      | 29.6     | 20          | 51        | 149.03   | 11              | 6           |
